# Supplementary material
Source: publisher figshare collection journal article supplement (https://karger.figshare.com/ndownloader/files/26676344)
Supplement: Supplementary file 1 [file 26676344]

| Assessment | n | 12 months pre-intervention | 8 months within intervention versus 12 months pre-intervention | | | 14 months within intervention versus 12 months pre-intervention | | |
| --- | --- | --- | --- | --- | --- | --- | --- | --- |
| Mean (SD) | Mean (SD) | Mean diff | 95% CrI | Mean (SD) | Mean diff | 95% CrI |
| Number of attacks/month | 26 | 1.15  (1.22) | 0.25 (0.25) | **-0,89*** | (-1,21; -0,58) | 0.23 (0.21) | **-0.92*** | (-1,22; -0,60) |

Table S2. Mean number of angioedema attacks per month (SD) and mean differences of number of attacks per month 8 and 14 months within intervention, as compared to 12 months pre-intervention.

95% CrI, 95% Credible Interval.

n, number of patients.

*Indicative of intervention benefit based on a 95% CrI excluding 0.
